# Supplementary material
Source: PubMed Central journal article supplement (PMC2629200)
Supplement: 0811914106_0811914106SI.pdf [file 0811914106_0811914106SI.pdf]

# Supporting Information

Wright and Tjian 10.1073/pnas.0811914106

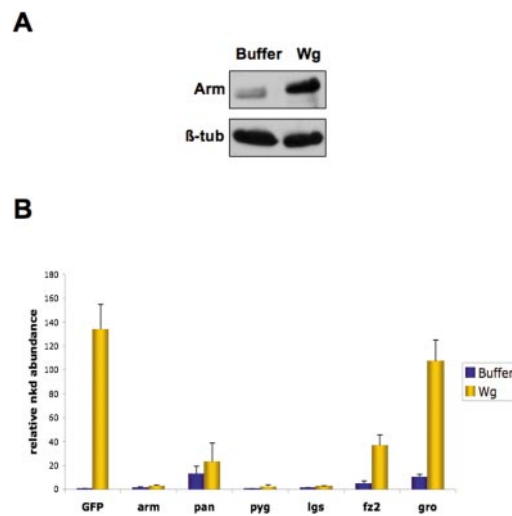

**Fig. S1.** Wg signaling in *Drosophila* S2R+ cells. (A) Armadillo is rapidly stabilized in S2R+ cells treated with partially purified Wg protein. After 2 h of treatment with either buffer or Wg, Armadillo stabilization was analyzed by immunoblotting with an anti-Armadillo antibody. An antibody directed against  $\beta$ -tubulin served as a loading control. (B) Activation of *nkd* requires most known Wg signaling components. S2R+ cells were treated with either control GFP dsRNA or a dsRNA directed against a component of the Wg signaling pathway. After 3 days, the cells were split and treated with either buffer or Wg. After 2 h, *nkd* expression was analyzed by qRT-PCR relative to *rpb1*.

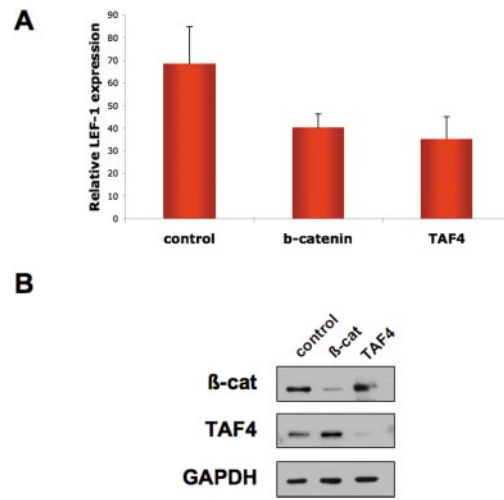

**Fig. S2.** TAF4 regulates the Wnt target gene LEF-1 in SW480 cells. (A) LEF-1 levels were analyzed by qPCR relative to rpb1 in SW480 cells transfected with either control scrambled siRNA,  $\beta$ -catenin siRNA, or an siRNA targeting TAF4. (B)  $\beta$ -Catenin and TAF4 levels were efficiently depleted by siRNA transfection as determined by immunoblotting with the indicated antibodies. GAPDH served as a loading control.
